# Supplementary material for: Two Distinct Categories of Focal Deletions in Cancer Genomes
Source: PLoS One. 2013 Jun 21;8(6):e66264. doi: 10.1371/journal.pone.0066264 (PMC3689739; doi:10.1371/journal.pone.0066264)
Supplement: Table S1 — Tumor samples, cancer cell lines, and xenografts used in this study. This table contains four columns describing for each sample the tumor type, sample ID, array CGH ID, and sample type. (XLS) [file pone.0066264.s002.xls]

## Sheet: Supplementary Table 1
Tumor Type	aCGH-ID	SampleID	Sample Type
Breast	DE358	KL00048	Tumor
Breast	DE360	KL00049	Tumor
Breast	DE362	KL00057	Tumor
Breast	DE364	KL00059	Tumor
Breast	DE366	KL00060	Tumor
Breast	DE368	KL00062	Tumor
Breast	DE370	KL00066	Tumor
Breast	DE372	KL00067	Tumor
Breast	DE386	KL00068	Tumor
Breast	DE388	KL00069	Tumor
Breast	DE390	KL00070	Tumor
Breast	DE392	KL00071	Tumor
Breast	DE394	KL00072	Tumor
Breast	DE396	KL00073	Tumor
Breast	DE398	KL00074	Tumor
Breast	DE400	KL00056	Tumor
Breast	DE402	KL00076	Tumor
Breast	DE404	KL00077	Tumor
Breast	DE406	KL00078	Tumor
Breast	DE408	KL00079	Tumor
Breast	DE420	KL00080	Tumor
Breast	DE422	KL00081	Tumor
Breast	DE424	KL00083	Tumor
Breast	DE426	KL00084	Tumor
Breast	DE428	KL00090	Tumor
Breast	DE430	KL00091	Tumor
Breast	DE432	KL00092	Tumor
Breast	DE434	KL00093	Tumor
Breast	DE482	KL00034	Tumor
Breast	DE484	KL00035	Tumor
Breast	DE486	KL00036	Tumor
Breast	DE488	KL00037	Tumor
Breast	DE490	KL00006	Tumor
Breast	DE492	KL00010	Tumor
Breast	DE494	KL00033	Tumor
Breast	DE496	KL00038	Tumor
Breast	EL153	MicMa137	Tumor
Breast	EL155	MicMa139	Tumor
Breast	EL157	MicMa140	Tumor
Breast	EL159	MicMa163	Tumor
Breast	EL161	MicMa165	Tumor
Breast	EL163	MicMa190	Tumor
Breast	EL167	MicMa209	Tumor
Breast	EL169	MicMa218	Tumor
Breast	EL171	MicMa187	Tumor
Breast	EL173	MicMa220	Tumor
Breast	EL175	MicMa221	Tumor
Breast	EL213	MicMa167	Tumor
Breast	EL215	MicMa171	Tumor
Breast	EL621	MicMa010	Tumor
Breast	EL623	MicMa016	Tumor
Breast	EL625	MicMa064	Tumor
Breast	EL627	MicMa066	Tumor
Breast	EL629	MicMa069	Tumor
Breast	EL631	WZ40	Tumor
Breast	EL633	WZ41	Tumor
Breast	EL635	WZ49	Tumor
Breast	EL637	WZ51	Tumor
Breast	EL639	WZ52	Tumor
Breast	EL641	WZ54	Tumor
Breast	EL643	WZ58	Tumor
Breast	EL645	WZ59	Tumor
Breast	EL647	WZ60	Tumor
Breast	EL649	WZ61	Tumor
Breast	EL651	WZ62	Tumor
Breast	EL653	WZ63	Tumor
Breast	EL655	WZ64	Tumor
Breast	EL657	WZ65	Tumor
Breast	EL659	WZ66	Tumor
Breast	EL663	WZ48	Tumor
Breast	EL665	WZ68	Tumor
Breast	EL669	WZ69	Tumor
Breast	EL671	WZ70	Tumor
Breast	EL673	WZ71	Tumor
Breast	EL675	WZ72	Tumor
Breast	EL677	WZ73	Tumor
Breast	EL681	WZ75	Tumor
Breast	EL685	WZ76	Tumor
Breast	EL687	WZ82	Tumor
Breast	EL689	WZ83	Tumor
Breast	EL691	WZ84	Tumor
Breast	EL693	WZ85	Tumor
Breast	JA1185	SK-BR-3	Cell line
Breast	JA682	KL00001	Tumor
Breast	JA686	KL00003	Tumor
Breast	JA688	KL00004	Tumor
Breast	JA690	KL00005	Tumor
Breast	JA694	KL00007	Tumor
Breast	JA696	KL00008	Tumor
Breast	JA698	KL00009	Tumor
Breast	JA797	KL00019	Tumor
Breast	JA799	KL00020	Tumor
Breast	JA801	KL00021	Tumor
Breast	JA803	KL00022	Tumor
Breast	JA805	KL00023	Tumor
Breast	JA807	KL00024	Tumor
Breast	JA809	KL00025	Tumor
Breast	JA811	KL00026	Tumor
Breast	JA813	KL00027	Tumor
Breast	JA815	KL00028	Tumor
Breast	JA913	KL00039	Tumor
Breast	JA915	KL00040	Tumor
Breast	JA917	KL00041	Tumor
Breast	JA919	KL00042	Tumor
Breast	JA921	KL00043	Tumor
Breast	JA923	KL00044	Tumor
Breast	JA925	KL00045	Tumor
Breast	JA927	KL00046	Tumor
Breast	JA943	KL00051	Tumor
Breast	JA945	KL00054	Tumor
Breast	JA947	KL00058	Tumor
Breast	JA949	KL00061	Tumor
Breast	JA951	KL00063	Tumor
Breast	JA953	KL00065	Tumor
Breast	JBH087	MicMA020	Tumor
Breast	JBH091	MicMA053	Tumor
Breast	JBH093	MicMA042	Tumor
Breast	JBH095	MicMA065	Tumor
Breast	JBH097	MicMA067	Tumor
Breast	JBH099	MicMA079	Tumor
Breast	JBH105	MicMA091	Tumor
Breast	JBH113	MicMA267	Tumor
Breast	JBH203	KL00053	Tumor
Breast	JBH205	KL00055	Tumor
Breast	JBH209	KL00085	Tumor
Breast	JBH211	KL00086	Tumor
Breast	JBH213	KL00050	Tumor
Breast	JBH215	KL00087	Tumor
Breast	JBH217	KL00088	Tumor
Breast	JBH219	KL00047	Tumor
Breast	JBH221	KL00089	Tumor
Breast	JBH367	MicMA088	Tumor
Breast	JBH375	MicMA632	Tumor
Breast	JBH401	KL00029	Tumor
Breast	JBH403	KL00030	Tumor
Breast	JBH405	KL00031	Tumor
Breast	JBH407	KL00032	Tumor
Breast	JBH489	MicMA185	Tumor
Breast	JBH491	MicMA085	Tumor
Breast	JBH497	MicMa222	Tumor
Breast	JBH499	MicMa223	Tumor
Breast	JBH513	MicMa430	Tumor
Breast	JBH515	MicMa451	Tumor
Breast	JBH519	MicMa470	Tumor
Breast	JBH521	MicMa476	Tumor
Breast	JBH523	MicMa488	Tumor
Breast	JBH525	MicMa493	Tumor
Breast	JBH527	MicMa512	Tumor
Breast	JBH529	MicMa551	Tumor
Breast	JBH531	MicMa579	Tumor
Breast	JBH535	MicMa630	Tumor
Breast	JBH537	MicMa722	Tumor
Breast	JBH539	MicMa308	Tumor
Breast	JBH541	MicMa309	Tumor
Breast	JBH545	MicMa334	Tumor
Breast	JBH547	MicMa338	Tumor
Breast	JBH549	MicMa341	Tumor
Breast	JBH551	MicMa355	Tumor
Breast	JBH555	MicMa363	Tumor
Breast	JBH557	MicMa371	Tumor
Breast	JBH559	MicMa373	Tumor
Breast	JBH561	MicMa378	Tumor
Breast	JT317	MDA-MB-453	Cell line
Breast	JT321	T47D	Cell line
Breast	JT331	CAMA-1	Cell line
Breast	KN0115	Du0010	Tumor
Breast	KN0116	Du0011	Tumor
Breast	KN0117	Du0012	Tumor
Breast	KN0483	HCC1008	Cell line
Breast	KN0484	HCC1143	Cell line
Breast	KN0485	HCC1187	Cell line
Breast	KN0486	HCC1395	Cell line
Breast	KN0487	HCC1599	Cell line
Breast	KN0488	HCC1937	Cell line
Breast	KN0489	HCC1954	Cell line
Breast	KN0490	HCC2157	Cell line
Breast	KN0491	HCC2218	Cell line
Breast	KN0891	HCC1419	Cell line
Breast	KN0893	HCC70	Cell line
Breast	KN1007	HCC1806	Cell line
Breast	KN1008	HCC1937	Cell line
Breast	KN1012	WZ135	Cell line
Breast	KN1013	BT-20	Cell line
Breast	KN1014	BT-483	Cell line
Breast	KN1015	BT-549	Cell line
Breast	KN1017	MDA-MB-157	Cell line
Breast	KN1018	MCF-7	Cell line
Breast	KN1020	MDA-MB-175-VII	Cell line
Breast	KN1021	MDA-MB-330	Cell line
Breast	KN1022	MDA-MB-361	Cell line
Breast	KN1023	MDA-MB-415	Cell line
Breast	KN1024	MDA-MB-436	Cell line
Breast	KN1026	MDA-MB-468	Cell line
Breast	KN1028	ZR-75-1	Cell line
Breast	KN1029	ZR-75-30	Cell line
Breast	KN1030	BT-474	Cell line
Breast	KN1031	UACC-893	Cell line
Breast	KN1032	MDA-MB-134-VI	Cell line
Breast	KN1033	DU4475	Cell line
Breast	KN1034	Hs578T	Cell line
Breast	KN1037	CAL-120	Cell line
Breast	KN1038	EVSA-T	Cell line
Breast	KN1039	MDA-MB-435	Cell line
Breast	KN1040	HCC1569	Cell line
Breast	KN1041	MFM-223	Cell line
Breast	KN1042	HCC38	Cell line
Breast	KN1043	UACC-812	Cell line
Breast	KN1055	MB157	Cell line
Breast	KN1056	HCC1500	Cell line
Breast	KN1087	HCC202	Cell line
Breast	KN1139	CAL-51	Cell line
Breast	KN1140	KPL-1	Cell line
Breast	KN1141	JIMT1	Cell line
Breast	KN1143	EFM-19	Cell line
Breast	KN1145	MT-3	Cell line
Breast	KN1146	CAL-148	Cell line
Breast	KN1147	COLO824	Cell line
Breast	MR025	KL00094	Tumor
Breast	MR027	KL00095	Tumor
Breast	MR029	KL00096	Tumor
Breast	MR031	KL00097	Tumor
Breast	MR037	KL00098	Tumor
Breast	MR039	KL00099	Tumor
Breast	MR041	KL00100	Tumor
Breast	MR043	KL00101	Tumor
Breast	MR045	KL00075	Tumor
Breast	MR047	KL00082	Tumor
Breast	MR059	KL00108	Tumor
Breast	MR061	KL00109	Tumor
Breast	MR063	KL00103	Tumor
Breast	MR065	KL00107	Tumor
Breast	MR067	KL00104	Tumor
Breast	MR069	KL00105	Tumor
Breast	MR071	KL00106	Tumor
Breast	MR079	KL00102	Tumor
Breast	MR091	KL00064	Tumor
Breast	MR095	WZ81	Tumor
Breast	MR101	MicMA088	Tumor
Breast	MR107	MicMA632	Tumor
Breast	MR153	WZ21	Tumor
Breast	MR157	WZ22	Tumor
Breast	MR159	WZ23	Tumor
Breast	MR161	WZ24	Tumor
Breast	MR165	MicMA185	Tumor
Breast	MR221	MicMA085	Tumor
Breast	MR225	MicMa222	Tumor
Breast	MR229	MicMa223	Tumor
Breast	MR233	MicMa430	Tumor
Breast	MR241	MicMa451	Tumor
Breast	MR245	MicMa470	Tumor
Breast	MR247	MicMa476	Tumor
Breast	MR251	MicMa488	Tumor
Breast	MR253	MicMa493	Tumor
Breast	MR255	MicMa512	Tumor
Breast	MR265	MicMa551	Tumor
Breast	MR267	MicMa579	Tumor
Breast	MR269	MicMa630	Tumor
Breast	MR277	MicMa722	Tumor
Breast	MR279	MicMa308	Tumor
Breast	MR281	MicMa309	Tumor
Breast	MR283	MicMa334	Tumor
Breast	MR287	MicMa338	Tumor
Breast	MR289	MicMa341	Tumor
Breast	MR291	MicMa355	Tumor
Breast	MR295	KL00146	Tumor
Breast	MR297	KL00147	Tumor
Breast	MR299	KL00148	Tumor
Breast	MR301	KL00149	Tumor
Breast	MR303	KL00140	Tumor
Breast	MR305	KL00141	Tumor
Breast	MR307	KL00142	Tumor
Breast	MR309	KL00143	Tumor
Breast	MR313	KL00130	Tumor
Breast	MR315	KL00131	Tumor
Breast	MR317	KL00132	Tumor
Breast	MR319	KL00133	Tumor
Breast	MR321	KL00134	Tumor
Breast	MR323	KL00135	Tumor
Breast	MR325	KL00136	Tumor
Breast	MR327	KL00137	Tumor
Breast	MR329	KL00138	Tumor
Breast	MR331	KL00139	Tumor
Breast	MR343	KL00110	Tumor
Breast	MR345	KL00111	Tumor
Breast	MR347	KL00112	Tumor
Breast	MR349	KL00113	Tumor
Breast	MR351	KL00114	Tumor
Breast	MR353	KL00115	Tumor
Breast	MR357	KL00116	Tumor
Breast	MR359	KL00117	Tumor
Breast	MR361	KL00118	Tumor
Breast	MR363	KL00119	Tumor
Breast	MR365	KL00120	Tumor
Breast	MR367	KL00121	Tumor
Breast	MR369	KL00122	Tumor
Breast	MR371	KL00123	Tumor
Breast	MR373	KL00124	Tumor
Breast	MR375	KL00125	Tumor
Breast	MR377	KL00126	Tumor
Breast	MR379	KL00127	Tumor
Breast	MR381	KL00128	Tumor
Breast	MR383	MicMa100	Tumor
Breast	MR387	MicMa112	Tumor
Breast	MR389	MicMa119	Tumor
Breast	MR393	KL00129	Tumor
Breast	MR417	MicMa388	Tumor
Breast	MR451	MicMa247	Tumor
Breast	MR453	MicMa381	Tumor
Colon	KN0001	1874A1	Tumor
Colon	KN0002	58A1	Tumor
Colon	KN0003	CACO2	Cell line
Colon	KN0004	COLO320DM	Cell line
Colon	KN0005	COLO320HSR	Cell line
Colon	KN0006	COLO206F	Cell line
Colon	KN0007	COLO678	Cell line
Colon	KN0010	HCT-15	Cell line
Colon	KN0011	HCT-116	Cell line
Colon	KN0017	SW1116	Cell line
Colon	KN0019	LOVO	Cell line
Colon	KN0020	LIM2045	Cell line
Colon	KN0021	LS123	Cell line
Colon	KN0023	LS180	Cell line
Colon	KN0024	LS103A	Cell line
Colon	KN0025	R	Cell line
Colon	KN0029	WiDr	Cell line
Colon	KN0030	1231A1	Tumor
Colon	KN0032	1672B1	Tumor
Colon	KN0033	1761A1	Tumor
Colon	KN0034	762A1	Tumor
Colon	KN0036	294A1	Tumor
Colon	KN0039	3522A1	Tumor
Colon	KN0040	3533A1	Tumor
Colon	KN0041	3571A1	Tumor
Colon	KN0042	3657A1	Tumor
Colon	KN0043	3879A1	Tumor
Colon	KN0045	3960A1	Tumor
Colon	KN0046	3975A1	Tumor
Colon	KN0047	3997A1	Tumor
Colon	KN0048	4032A1	Tumor
Colon	KN0049	4048A1	Tumor
Colon	KN0063	1704A1	Tumor
Colon	KN0064	4112A1	Tumor
Colon	KN0065	4192A1	Tumor
Colon	KN0066	4386A1	Tumor
Colon	KN0067	4471B1	Tumor
Colon	KN0068	4474B1	Tumor
Colon	KN0069	4504B1	Tumor
Colon	KN0070	4519B1	Tumor
Colon	KN0071	4550B1	Tumor
Colon	KN0072	4612A1	Tumor
Colon	KN0073	4644A1	Tumor
Colon	KN0074	4652A1	Tumor
Colon	KN0203	DN000014A9	Tumor
Colon	KN0204	DN000014AB	Tumor
Colon	KN0207	DN000014B1	Tumor
Colon	KN0211	DN000014B9	Tumor
Colon	KN0213	DN000014BD	Tumor
Colon	KN0285	LS174T	Cell line
Colon	KN0287	SW480	Cell line
Colon	KN0288	SW620	Cell line
Colon	KN0289	SW948	Cell line
Colon	KN0473	NsCo0284TA	Tumor
Colon	KN0474	NsCo0126TA	Tumor
Colon	KN0492	CHTN0392	Tumor
Colon	KN0493	CHTN0397	Tumor
Colon	KN0494	CHTN0447	Tumor
Colon	KN0495	CHTN0581	Tumor
Colon	KN0496	CHTN0588	Tumor
Colon	KN0497	CHTN0593	Tumor
Colon	KN0498	CHTN0616	Tumor
Colon	KN0499	NsCo0125T	Tumor
Colon	KN0501	NsCo0132T	Tumor
Colon	KN0502	NsCo0136T	Tumor
Colon	KN0503	NsCo0152T	Tumor
Colon	KN0504	NsCo0157T	Tumor
Colon	KN0505	NsCo0181T	Tumor
Colon	KN0506	NsCo0267T	Tumor
Colon	KN0507	NsCo0302T	Tumor
Colon	KN0531	CHTN0407A	Tumor
Colon	KN0532	CHTN0443A	Tumor
Colon	KN0533	CHTN0494A	Tumor
Colon	KN0534	CHTN0504A	Tumor
Colon	KN0535	CHTN0515A	Tumor
Colon	KN0536	CHTN0633A	Tumor
Colon	KN0538	NsCo0261TA	Tumor
Colon	KN0570	B1 S 4007942	Tumor
Colon	KN0571	B1 S 4005028	Tumor
Colon	KN0572	B1 S 4005073	Tumor
Colon	KN0573	B1 S 1858	Tumor
Colon	KN0574	B1 S 2326	Tumor
Colon	KN0575	B2 S 1259	Tumor
Colon	KN0576	B2 S 2504	Tumor
Colon	KN0577	B2 S 2557	Tumor
Colon	KN0578	B2 S 3007	Tumor
Colon	KN0580	B2 S 4004829	Tumor
Colon	KN0581	B2 S 4004872	Tumor
Colon	KN0582	B2 S 4005490	Tumor
Colon	KN0583	B2 S 4550b	Tumor
Colon	KN0585	B2 S 1004	Tumor
Colon	KN0592	B2 S 1882	Tumor
Colon	KN0593	B2 S 2057	Tumor
Colon	KN0594	B2 S 2100	Tumor
Colon	KN0595	B2 S 2159	Tumor
Colon	KN0596	B2 S 2198	Tumor
Colon	KN0597	B2 S 2419	Tumor
Colon	KN0598	B2 S 4006814	Tumor
Colon	KN0599	B2 S 4006858	Tumor
Colon	KN0600	B2 S 4007045	Tumor
Colon	KN0601	B2 S 4007270	Tumor
Colon	KN0602	B2 S 4007413	Tumor
Colon	KN0603	B2 S 4007416	Tumor
Colon	KN0604	B2 S 4007592	Tumor
Colon	KN0605	B2 S 4007820	Tumor
Colon	KN0606	B2 S 4007932	Tumor
Colon	KN0607	B2 S 4008078	Tumor
Colon	KN0609	Met D 4007509	Tumor
Colon	KN0611	Met D 4004793	Tumor
Colon	KN0612	Met D 4006587	Tumor
Colon	KN0613	Met D 4006261	Tumor
Colon	KN0744	Met D 4007350	Tumor
Colon	KN0745	Met D 4030283	Tumor
Colon	KN0746	Met D 4008460	Tumor
Colon	KN0747	Met D 4007243	Tumor
Colon	KN0748	Met D 4006274	Tumor
Colon	KN0749	Met D 2406b	Tumor
Colon	KN0750	Met D 4008824	Tumor
Colon	KN0751	Met D 4007822	Tumor
Colon	KN0752	B2 S 4008653	Tumor
Colon	KN0753	Met D 4008382	Tumor
Colon	KN0754	Met D 4009272	Tumor
Colon	KN0755	Met D 4007448	Tumor
Colon	KN0811	Met D 6104	Tumor
Colon	KN0812	Met D 4008747	Tumor
Colon	KN0813	Met D 4004532	Tumor
Colon	KN0814	Met D 4007246	Tumor
Colon	KN0815	Met D 6108	Tumor
Colon	KN0816	Met D 4008813	Tumor
Colon	KN0817	Met D 2433	Tumor
Colon	KN0818	Met D 4007670	Tumor
Colon	KN0819	Met D 4008720	Tumor
Colon	KN0820	Met D 4007440	Tumor
Colon	KN0821	Met D 4006805	Tumor
Colon	KN0822	Met D 4007072	Tumor
Colon	KN0823	Met D 4006972	Tumor
Colon	KN0824	Met D 4030178	Tumor
Colon	KN0825	Met D 4008565	Tumor
Colon	KN0826	Met D 4005174	Tumor
Colon	KN0827	Met D 4007464	Tumor
Colon	KN0828	Met D 4009161	Tumor
Colon	KN0829	Met D 4005687	Tumor
Colon	KN0830	Met D 4009046	Tumor
Colon	KN0831	V9M	Cell line
Colon	KN0833	V394	Cell line
Colon	KN0834	V400	Cell line
Colon	KN0835	V410	Cell line
Colon	KN0836	V503	Cell line
Colon	KN0837	V576	Cell line
Colon	KN0838	V10M	Cell line
Colon	KN0840	V429	Cell line
Colon	KN0841	V456	Cell line
Colon	KN0842	V531	Cell line
Colon	KN1077	MSI2529	Tumor
Colon	KN1078	MSI2577	Tumor
Colon	KN1079	4555a	Tumor
Colon	KN1080	MSI4124	Tumor
Colon	KN1082	MSI4892	Tumor
Colon	KN1083	MSI1199	Tumor
Colon	KN1084	MSI1951	Tumor
Colon	KN1085	MSI5855	Tumor
Colon	KN1086	MSI2469	Tumor
Colon	KN1109	3164 vs 3163	Tumor
GBM	EL545	CCF0014	Tumor
GBM	EL547	CCF0013	Tumor
GBM	EL553	CCF0015	Tumor
GBM	EL569	CCF0026	Tumor
GBM	EL571	CCF0025	Tumor
GBM	EL573	CCF0026	Tumor
GBM	EL581	CCF0022	Tumor
GBM	EL587	CCF0029	Tumor
GBM	EL591	CCF0021	Tumor
GBM	EL593	CCF0022	Tumor
GBM	EL599	CCF0028	Tumor
GBM	EL601	CCF0027	Tumor
GBM	EL603	CCF0028	Tumor
GBM	EL605	CCF0017	Tumor
GBM	EL609	CCF0019	Tumor
GBM	EL613	CCF0031	Tumor
GBM	EL617	CCF0023	Tumor
GBM	IO076	U-343MG	Cell line
GBM	IO078	U-138MG	Cell line
GBM	IO080	U-251MG	Cell line
GBM	IO084	A382	Cell line
GBM	IO086	SW1088	Cell line
GBM	IO088	SW1783	Cell line
GBM	IO090	A172	Cell line
GBM	IO092	U-118MG	Cell line
GBM	IO094	U-373MG	Cell line
GBM	JA1211	CCF0007	Tumor
GBM	JA1213	CCF0008	Tumor
GBM	JA1217	CCF0010	Tumor
GBM	JA1219	CCF0011	Tumor
GBM	JA1223	CCF0012	Tumor
Liver	KN0298	8H49UAVE	Tumor
Liver	KN0299	1158A1	Tumor
Liver	KN0300	1592A1	Tumor
Liver	KN0301	2067A1	Tumor
Liver	KN0302	2093A1	Tumor
Liver	KN0303	2037A1	Tumor
Liver	KN0304	2201A1	Tumor
Liver	KN0305	3523A1	Tumor
Liver	KN0306	1316A1	Tumor
Liver	KN0307	1535A1	Tumor
Liver	KN0308	542A1	Tumor
Liver	KN0309	550A1	Tumor
Liver	KN0310	2163A1	Tumor
Liver	KN0311	CU0000000604	Tumor
Liver	KN0312	CU0000000996	Tumor
Liver	KN0313	CU0000005407	Tumor
Liver	KN0319	CU0000006675	Tumor
Liver	KN0320	CU1046	Tumor
Liver	KN0321	CU0000005719	Tumor
Liver	KN0324	CHTN0726	Tumor
Liver	KN0325	5417A1	Tumor
Liver	KN0326	CHTN0931	Tumor
Liver	KN0327	4009A1	Tumor
Liver	KN0328	5567A1	Tumor
Liver	KN0329	CU0000001197	Tumor
Liver	KN0444	B86-150	Tumor
Liver	KN0566	HK882	Tumor
Liver	KN0567	HK903	Tumor
Liver	KN0586	CHTN726	Tumor
Liver	KN0587	CHTN931	Tumor
Liver	KN0588	SK-HEP-1	Cell line
Liver	KN0616	Hep3B	Cell line
Liver	KN0617	Huh7	Cell line
Liver	KN0618	Alexander	Cell line
Liver	KN0619	Li7	Cell line
Liver	KN0620	HepG2	Cell line
Liver	KN0632	CHTN1223A	Tumor
Liver	KN0633	CHTN1303A	Tumor
Liver	KN0634	CHTN1422A	Tumor
Liver	KN0636	CHTN1047	Tumor
Liver	KN0637	CHTN1147	Tumor
Liver	KN0638	CHTN1294	Tumor
Liver	KN0639	CHTN1512	Tumor
Liver	KN0648	SK0001	Tumor
Liver	KN0649	SK0002	Tumor
Liver	KN0650	SK0003	Tumor
Liver	KN0651	SK0004	Tumor
Liver	KN0652	SK0005	Tumor
Liver	KN0653	SK0006	Tumor
Liver	KN0654	SK0007	Tumor
Liver	KN0655	SK0008	Tumor
Liver	KN0656	SK0009	Tumor
Liver	KN0657	SK0010	Tumor
Liver	KN0658	SK0011	Tumor
Liver	KN0659	SK0012	Tumor
Liver	KN0660	SK0013	Tumor
Liver	KN0661	SK0014	Tumor
Liver	KN0662	SK0015	Tumor
Liver	KN0663	SK0016	Tumor
Liver	KN0664	SK0017	Tumor
Liver	KN0665	SK0018	Tumor
Liver	KN0666	SK0019	Tumor
Liver	KN0667	SK0020	Tumor
Liver	KN0695	CHTN1792	Tumor
Liver	KN0696	CHTN1791	Tumor
Liver	KN0698	CW-R	Tumor
Liver	KN0699	CLM-R	Tumor
Liver	KN0700	KYA-R	Tumor
Liver	KN0701	WCC-RF	Tumor
Liver	KN0702	SHL-RF	Tumor
Liver	KN0704	CWR-RF	Tumor
Liver	KN0712	SNU182	Cell line
Liver	KN0717	SNU475	Cell line
Liver	KN0726	SNU387	Cell line
Liver	KN0727	SNU398	Cell line
Liver	KN0728	SNU423	Cell line
Liver	KN0729	SNU449	Cell line
Liver	KN0870	HK316	Tumor
Liver	KN0871	HK372	Tumor
Liver	KN0873	HK409	Tumor
Liver	KN0874	HK3459	Tumor
Liver	KN0875	HK3467	Tumor
Liver	KN0876	HK3511	Tumor
Liver	KN0879	HK165	Tumor
Liver	KN0880	HK219	Tumor
Liver	KN0882	HK261	Tumor
Liver	KN0884	HK333	Tumor
Liver	KN0886	HK3461	Tumor
Liver	KN0887	HK3477	Tumor
Liver	KN0888	HK3489	Tumor
Liver	KN0995	HK106	Tumor
Liver	KN0996	HK179	Tumor
Liver	KN0997	HK414	Tumor
Liver	KN0998	HK703	Tumor
Liver	KN0999	HK732	Tumor
Liver	KN1000	HK796	Tumor
Liver	KN1001	HK838	Tumor
Liver	KN1002	HK847B	Tumor
Liver	KN1003	HK892	Tumor
Liver	KN1004	HK949	Tumor
Lung	KN0120	6653A1	Tumor
Lung	KN0121	7318B1	Tumor
Lung	KN0122	9149A1	Tumor
Lung	KN0125	10024B1	Tumor
Lung	KN0129	11029B1	Tumor
Lung	KN0130	110000	Tumor
Lung	KN0134	FR000272A1	Tumor
Lung	KN0135	FR5B336AF5	Tumor
Lung	KN0137	FR00033A79	Tumor
Lung	KN0142	FR000274D6	Tumor
Lung	KN0143	FR0002F4C1	Tumor
Lung	KN0146	FR0001CC90	Tumor
Lung	KN0151	FR00016A74	Tumor
Lung	KN0152	FR00038395	Tumor
Lung	KN0153	FR5B33B9B3	Tumor
Lung	KN0154	FR00016BBB	Tumor
Lung	KN0158	9419A1	Tumor
Lung	KN0159	9420A1	Tumor
Lung	KN0160	9572A1	Tumor
Lung	KN0161	9596B1	Tumor
Lung	KN0236	DN0000154D	Tumor
Lung	KN0237	DN0000154F	Tumor
Lung	KN0238	DN00001551	Tumor
Lung	KN0239	DN00001553	Tumor
Lung	KN0240	DN00001555	Tumor
Lung	KN0241	DN00001557	Tumor
Lung	KN0242	DN00001559	Tumor
Lung	KN0244	DN0000155D	Tumor
Lung	KN0245	DN0000155F	Tumor
Lung	KN0246	DN00001561	Tumor
Lung	KN0247	DN00001563	Tumor
Lung	KN0248	CU0250	Tumor
Lung	KN0249	CU0602	Tumor
Lung	KN0250	CU0288	Tumor
Lung	KN0251	CU0336	Tumor
Lung	KN0252	CU0135	Tumor
Lung	KN0253	DN00001565	Tumor
Lung	KN0254	DN00001567	Tumor
Lung	KN0255	DN00001575	Tumor
Lung	KN0256	DN00001577	Tumor
Lung	KN0257	DN00001579	Tumor
Lung	KN0258	DN0000157B	Tumor
Lung	KN0259	DN0000157D	Tumor
Lung	KN0260	DN0000157F	Tumor
Lung	KN0261	DN00001581	Tumor
Lung	KN0262	DN00001583	Tumor
Lung	KN0263	DN00001585	Tumor
Lung	KN0265	DN00001589	Tumor
Lung	KN0266	DN0000158B	Tumor
Lung	KN0267	DN0000158D	Tumor
Lung	KN0269	DN00001591	Tumor
Lung	KN0270	DN00001593	Tumor
Lung	KN0271	DN00001595	Tumor
Lung	KN0274	DN0000159B	Tumor
Lung	KN0315	10035B1	Tumor
Lung	KN0330	4A1	Tumor
Lung	KN0331	106A1	Tumor
Lung	KN0333	3967A1	Tumor
Lung	KN0335	3824A1	Tumor
Lung	KN0336	3996A1	Tumor
Lung	KN0337	371A1	Tumor
Lung	KN0338	217A1	Tumor
Lung	KN0339	263A1	Tumor
Lung	KN0340	431A1	Tumor
Lung	KN0341	436A1	Tumor
Lung	KN0346	556B1	Tumor
Lung	KN0347	4485B1	Tumor
Lung	KN0348	308A1	Tumor
Lung	KN0349	31A1	Tumor
Lung	KN0351	4616A1	Tumor
Lung	KN0352	3617A1	Tumor
Lung	KN0353	1683A1	Tumor
Lung	KN0354	4004A1	Tumor
Lung	KN0355	4736A1	Tumor
Lung	KN0356	4028A1	Tumor
Lung	KN0358	1849A1	Tumor
Lung	KN0360	705B1	Tumor
Lung	KN0361	770A1	Tumor
Lung	KN0362	1992A1	Tumor
Lung	KN0367	5485A1	Tumor
Lung	KN0369	766A1	Tumor
Lung	KN0372	2224A1	Tumor
Lung	KN0373	690A1	Tumor
Lung	KN0374	756A1	Tumor
Lung	KN0377H	5492A1	Tumor
Lung	KN0396	5436A1	Tumor
Lung	KN0397	450A1	Tumor
Lung	KN0398	CHTN738	Tumor
Lung	KN0400	CHTN728	Tumor
Lung	KN0401	CHTN681	Tumor
Lung	KN0402	CHTN670	Tumor
Lung	KN0403	CHTN650	Tumor
Lung	KN0404	CHTN587	Tumor
Lung	KN0405	CHTN582	Tumor
Lung	KN0406	CHTN583	Tumor
Lung	KN0407	7751B1	Tumor
Lung	KN0408	8292A1	Tumor
Lung	KN0410	7A1	Tumor
Lung	KN0412	4169A1	Tumor
Lung	KN0413	4211A1	Tumor
Lung	KN0414	4222A1	Tumor
Lung	KN0416	5857A1	Tumor
Lung	KN0417	7352B1	Tumor
Lung	KN0418	7734A1	Tumor
Lung	KN0419	9341A1	Tumor
Lung	KN0420	H460	Cell line
Lung	KN0421	H727	Cell line
Lung	KN0422	H1563	Cell line
Lung	KN0423	H838	Cell line
Lung	KN0424	H69	Cell line
Lung	KN0425	H661	Cell line
Lung	KN0427	H510A	Cell line
Lung	KN0428	H345	Cell line
Lung	KN0429	H2347	Cell line
Lung	KN0431	CPC-N	Cell line
Lung	KN0433	H1399	Cell line
Lung	KN0434	A427	Cell line
Lung	KN0435	H1568	Cell line
Lung	KN0436	H1792	Cell line
Lung	KN0437	H1650	Cell line
Lung	KN0438	H1437	Cell line
Lung	KN0439	H211	Cell line
Lung	KN0441	H196	Cell line
Lung	KN0442	DMS114	Cell line
Lung	KN0443	HCC15	Cell line
Lung	KN0448	MSI32120	Tumor
Lung	KN0563	H647	Cell line
Lung	KN0756	H2170	Cell line
Lung	KN0757	CHAGO-K-1	Cell line
Lung	KN0758	SCLC-21H	Cell line
Lung	KN0759	NCI-H1703	Cell line
Lung	KN0760	SCLC-22H	Cell line
Lung	KN0761	NCI-H2122	Cell line
Lung	KN0762	NCI-H82	Cell line
Lung	KN0763	SK-LC-17	Cell line
Lung	KN0765	NCI-H1395	Cell line
Lung	KN0766	HCC-366	Cell line
Lung	KN0767	NCI-H1838	Cell line
Lung	KN0769	SKLC-13	Cell line
Lung	KN0770	SKLU-1	Cell line
Lung	KN0773	LXF-289	Cell line
Lung	KN0774	EPLC-272H	Cell line
Lung	KN0775	MSI9812	Cell line
Lung	KN0776	NHBE	Cell line
Lung	KN0777	NCI-H526	Cell line
Lung	KN0778	NCI-H187	Cell line
Lung	KN0779	NCI-522	Cell line
Lung	KN0780	LCLC-97TMI	Cell line
Lung	KN0781	NCI-H2126	Cell line
Lung	KN0783	UMC-11	Cell line
Lung	KN0784	NCI-H292	Cell line
Lung	KN0785	NCI-157	Cell line
Lung	KN0786	BEN	Cell line
Lung	KN0787	LCLC-103H	Cell line
Lung	KN0788	CAL-12T	Cell line
Lung	KN0789	COLO677	Cell line
Lung	KN0791	NCI-H596	Cell line
Lung	KN0792	A549	Cell line
Lung	KN0793	NCI-322	Cell line
Lung	KN0794	NCI-H146	Cell line
Lung	KN0795	NCI-H209	Cell line
Lung	KN0796	CALU-3	Cell line
Lung	KN0797	CALU-1	Cell line
Lung	KN0798	NCI-H358	Cell line
Lung	KN0799	NCI-H820	Cell line
Lung	KN0800	NCI-H1299	Cell line
Lung	KN0801	NCI-H446	Cell line
Lung	KN0802	SW900	Cell line
Lung	KN0803	SK-LC-3	Cell line
Lung	KN0804	H1792	Cell line
Lung	KN0846	CHTN0235	Tumor
Lung	KN0847	CHTN0260	Tumor
Lung	KN0848	CHTN0303	Tumor
Lung	KN0849	CHTN0347	Tumor
Lung	KN0850	CHTN0388	Tumor
Lung	KN0851	CHTN0415	Tumor
Lung	KN0852	CHTN0450	Tumor
Lung	KN0853	CHTN0463	Tumor
Lung	KN0854	CHTN0465	Tumor
Lung	KN0855	CHTN0492	Tumor
Lung	KN0856	CHTN0512	Tumor
Lung	KN0857	CHTN0516	Tumor
Lung	KN0858	CHTN0534	Tumor
Lung	KN0859	CHTN0535	Tumor
Lung	KN0860	CHTN0566	Tumor
Lung	KN0861	CHTN0643	Tumor
Lung	KN0862	CHTN0670	Tumor
Lung	KN0863	CHTN0728	Tumor
Lung	KN0864	CHTN0965	Tumor
Lung	KN0865	CHTN0971	Tumor
Lung	KN0866	CHTN0976	Tumor
Lung	KN0867	CHTN0980	Tumor
Lung	KN0868	CHTN0982	Tumor
Lung	KN0869	CHTN0985	Tumor
Lung	KN0890	FR00016BBB	Tumor
Lung	KN0932	DN00001597	Tumor
Lung	KN0937	4727A1	Tumor
Lung	KN0938	7733B1	Tumor
Lung	KN0939	7735A1	Tumor
Lung	KN0952	2224A1	Tumor
Lung	KN0953	CHTN987A	Tumor
Lung	KN0954	CHTN991A	Tumor
Lung	KN0956	31749A1C	Tumor
Lung	KN0957	38037A1F	Tumor
Lung	KN0959	37817A1B	Tumor
Lung	KN0960	38648A1J	Tumor
Lung	KN0961	38391A1C	Tumor
Lung	KN0962	39241A1C	Tumor
Lung	KN0963	35768A1A	Tumor
Lung	KN0964	39458A1E	Tumor
Lung	KN0965	39558A1C	Tumor
Lung	KN0966	39443A1C	Tumor
Lung	KN0967	39824A1A	Tumor
Lung	KN0968	H520	Cell line
Lung	KN0969	H125	Cell line
Lung	KN0970	H1155	Cell line
Lung	KN0971	H889	Cell line
Lung	KN0972	HLC-1	Cell line
Lung	KN0973	H417	Cell line
Lung	KN0974	H1688	Cell line
Lung	KN0975	H441	Cell line
Lung	KN0976	SK-MES-1	Cell line
Lung	KN0977	39926A1C	Tumor
Lung	KN0978	39160A1D	Tumor
Lung	KN0979	39630A1E	Tumor
Lung	KN0982	39830A1C	Tumor
Lung	KN0983	37011A1C	Tumor
Lung	KN0984	39458A1E	Tumor
Lung	KN0985	38746A1G	Tumor
Lung	KN0986	39061A1H	Tumor
Lung	KN0987	38654A1D	Tumor
Lung	KN0988	36618A1E	Tumor
Lung	KN0989	31146A1A	Tumor
Lung	KN0990	39407A1C	Tumor
Lung	KN1256	ABC1	Cell line
Lung	KN1257	NCI-H1623	Cell line
Lung	KN1258	NCI-H1693	Cell line
Lung	KN1259	NCI-H1793	Cell line
Lung	KN1260	NCI-H1944	Cell line
Lung	KN1262	NCI-H2023	Cell line
Lung	KN1263	NCI-H2030	Cell line
Lung	KN1264	NCI-H2085	Cell line
Lung	KN1265	PC9	Cell line
Lung	KN1266	HCC78	Cell line
Lung	KN1267	HCC827	Cell line
Lung	KN1268	HCC15	Cell line
Lung	KN1269	CORL23	Cell line
Lung	KN1270	CDD14BR	Cell line
Lung	KN1271	LC1sq	Cell line
Lung	KN1272	LK2	Cell line
Lung	KN1273	RERFLCKJ	Cell line
Lung	KN1274	STC1	Cell line
Lung	KN1276	DV90	Cell line
Lung	KN1277	273T	Cell line
Lung	KN1278	WI38VA13	Cell line
Lung	KN1279	VMRCLCD	Cell line
Melanoma	KN0173	CU100	Tumor
Melanoma	KN0174	CU718	Tumor
Melanoma	KN0175	CU698	Tumor
Melanoma	KN0176	CI8528	Tumor
Melanoma	KN0177	CU9094	Tumor
Melanoma	KN0178	CU112	Tumor
Melanoma	KN0179	1370A1	Tumor
Melanoma	KN0180	6816A1	Tumor
Melanoma	KN0181	53127A2	Tumor
Melanoma	KN0182	CI7668	Tumor
Melanoma	KN0183	CU970	Tumor
Melanoma	KN0184	CU131	Tumor
Melanoma	KN0185	6817A1	Tumor
Melanoma	KN0186	FLNZ9A4W	Tumor
Melanoma	KN0187	6853A1	Tumor
Melanoma	KN0188	CU78	Tumor
Melanoma	KN0189	CU144	Tumor
Melanoma	KN0190	3881A1	Tumor
Melanoma	KN0191	6843A1	Tumor
Melanoma	KN0192	795HWA6L	Tumor
Melanoma	KN0193	CU1651	Tumor
Melanoma	KN0194	CI791	Tumor
Melanoma	KN0195	CU213	Tumor
Melanoma	KN0196	6752A1	Tumor
Melanoma	KN1088	SKMEL-28	Cell line
Melanoma	KN1089	SKMEL-1	Cell line
Melanoma	KN1090	SKMEL-19	Cell line
Melanoma	KN1091	SKMEL-24	Cell line
Melanoma	KN1092	SKMEL-30	Cell line
Melanoma	KN1093	SKMEL-173	Cell line
Melanoma	KN1094	SKMEL-103	Cell line
Melanoma	KN1095	SKMEL-29	Cell line
Melanoma	KN1133	SK-MEL-11	Cell line
Melanoma	KN1134	SK-MEL-12	Cell line
Melanoma	KN1135	SK-MEL-23	Cell line
Melanoma	KN1136	SK-MEL-27	Cell line
Melanoma	KN1137	SK-MEL109	Cell line
Melanoma	KN1138	SK-MEL-113	Cell line
Melanoma	KN1162	SK-MEL-022	Cell line
Melanoma	KN1163	SK-MEL-085	Cell line
Melanoma	KN1164	SK-MEL-100	Cell line
Melanoma	KN1165	SK-MEL-105	Cell line
Melanoma	KN1166	SK-MEL-118	Cell line
Melanoma	KN1167	SK-MEL-130	Cell line
Melanoma	KN1168	SK-MEL-178	Cell line
Melanoma	KN1169	SK-MEL-187	Cell line
Melanoma	KN1170	SK-MEL-196	Cell line
Melanoma	KN1171	SK-MEL-199A	Cell line
Melanoma	KN1172	SK-MEL-199S	Cell line
Melanoma	KN1173	SK-MEL-200	Cell line
Melanoma	KN1174	SK-MEL-208	Cell line
Melanoma	KN1175	SK-MEL-217	Cell line
Melanoma	KN1176	SK-MEL-238	Cell line
Melanoma	KN1177	SK-MEL-239	Cell line
Melanoma	KN1178	S01-16550	Tumor
Melanoma	KN1179	MSKCC-79536	Tumor
Melanoma	KN1180	S02-348934	Tumor
Melanoma	KN1181	S03-179402	Tumor
None	None	None	None
Ovarian	AB1000	4203	Tumor
Ovarian	AB1001	4600	Tumor
Ovarian	AB1002	1370A1	Tumor
Ovarian	AB1003	6816A1	Tumor
Ovarian	AB1004	53127A2	Tumor
Ovarian	AB329	CHTN0452A	Tumor
Ovarian	AB330	CHTN0558A	Tumor
Ovarian	AB333	XU0022A	Tumor
Ovarian	AB357	CHTN0114A	Tumor
Ovarian	AB361	CHTN0565A	Tumor
Ovarian	AB363	CHTN0577A	Tumor
Ovarian	AB365	CHTN0963A	Tumor
Ovarian	AB367	XU0009	Tumor
Ovarian	AB369	XU0012	Tumor
Ovarian	AB387	XU0001A	Tumor
Ovarian	AB389	XU0003A	Tumor
Ovarian	AB391	XU0004A	Tumor
Ovarian	AB393	XU0006A	Tumor
Ovarian	AB395	XU0007A	Tumor
Ovarian	AB397	CHTN0478A	Tumor
Ovarian	AB399	CHTN0561A	Tumor
Ovarian	AB401	CHTN0562A	Tumor
Ovarian	AB403	CHTN0957A	Tumor
Ovarian	AB405	CAOV-4	Cell line
Ovarian	AB407	ES-2	Cell line
Ovarian	AB409	OVCAR3	Cell line
Ovarian	AB411	SK-OV-3	Cell line
Ovarian	AB425	CHTN0480A	Tumor
Ovarian	AB427	CHTN0531A	Tumor
Ovarian	AB429	XU0002A	Tumor
Ovarian	AB431	XU0011A	Tumor
Ovarian	AB445	XU0014A	Tumor
Ovarian	AB447	XU0015A	Tumor
Ovarian	AB448	XU0016A	Tumor
Ovarian	AB451	XU0019A	Tumor
Ovarian	AB453	XU0021A	Tumor
Ovarian	AB538	MP0010A	Tumor
Ovarian	AB540	MP0016A	Tumor
Ovarian	AB542	CHTN0745A	Tumor
Ovarian	AB544	CHTN0770A	Tumor
Ovarian	AB546	CHTN0778A	Tumor
Ovarian	AB614	CHTN0740A	Tumor
Ovarian	AB616	CHTN0748A	Tumor
Ovarian	AB624	CHTN0772A	Tumor
Ovarian	AB626	CHTN0773A	Tumor
Ovarian	AB628	CHTN0775A	Tumor
Ovarian	AB811	CHTN0753A	Tumor
Ovarian	AB813	CHTN0756A	Tumor
Ovarian	AB815	CHTN0758A	Tumor
Ovarian	AB817	CHTN0769A	Tumor
Ovarian	AB819	CHTN0779A	Tumor
Ovarian	AB821	CHTN0787A	Tumor
Ovarian	AB823	KC0021	Tumor
Ovarian	AB825	KC0022	Tumor
Ovarian	AB827	KC0023	Tumor
Ovarian	AB829	KC0025	Tumor
Ovarian	AB831	KC0026	Tumor
Ovarian	AB833	KC0027	Tumor
Ovarian	AB835	KC0028	Tumor
Ovarian	AB837	KC0029	Tumor
Ovarian	AB843	KC0034	Tumor
Ovarian	AB845	KC0036	Tumor
Ovarian	AB847	KC0041	Tumor
Ovarian	AB849	KC0045	Tumor
Ovarian	AB851	KC0046	Tumor
Ovarian	AB855	3709	Tumor
Ovarian	AB857	3935	Tumor
Ovarian	AB865	GCT0001	Tumor
Ovarian	AB867	GCT0002	Tumor
Ovarian	AB869	GCT0003	Tumor
Ovarian	AB871	GCT0004	Tumor
Ovarian	AB955	2729	Tumor
Ovarian	AB957	2834	Tumor
Ovarian	AB959	3118	Tumor
Ovarian	AB961	3137	Tumor
Ovarian	AB963	3331	Tumor
Ovarian	AB965	3546	Tumor
Ovarian	AB967	3654	Tumor
Ovarian	AB969	3729	Tumor
Ovarian	AB971	3859	Tumor
Ovarian	AB975	CHTN0288A	Tumor
Ovarian	AB977	CHTN0310A	Tumor
Ovarian	AB979	CHTN0533A	Tumor
Ovarian	AB981	CHTN0541A	Tumor
Ovarian	AB983	CHTN0552A	Tumor
Ovarian	AB985	CHTN0555A	Tumor
Ovarian	AB987	CHTN0564A	Tumor
Ovarian	AB989	CHTN0580A	Tumor
Ovarian	AB991	CHTN0652A	Tumor
Ovarian	AB993	CHTN0653A	Tumor
Ovarian	AB995	3917	Tumor
Ovarian	AB996	3924	Tumor
Ovarian	AB997	3942	Tumor
Ovarian	AB998	4047	Tumor
Ovarian	AB999	4064	Tumor
Ovarian	CH412	PA-1	Cell line
Ovarian	KK072	TOV-21G	Cell line
Ovarian	OD162	COLO316	Cell line
Ovarian	OD168	CAOV-3	Cell line
Ovarian	OD332	CHTN0796A	Tumor
Ovarian	OD333	CHTN0798A	Tumor
Ovarian	OD335	CHTN0841A	Tumor
Ovarian	OD336	CHTN0866A	Tumor
Ovarian	SE21	CAOV-1	Cell line
Ovarian	SE22	SW626	Cell line
Ovarian	SE23	OVCAR4	Cell line
Ovarian	SE24	OVCAR5	Cell line
Ovarian	SE25	OVCAR8	Cell line
Ovarian	SE46	TOV-112D	Cell line
Ovarian	SE47	OV-90	Cell line
Ovarian	TA053	MP0006A	Tumor
Ovarian	TA055	MP0013D	Tumor
Ovarian	TA057	MP0028A	Tumor
Ovarian	TA062	MP0033A	Tumor
Ovarian	TA063	MP0037A	Tumor
Ovarian	TA068	MP0038A	Tumor
Ovarian	TA074	3935	Tumor
Ovarian	TA077	3887	Tumor
Ovarian	TA090	CHTN0812A	Tumor
Ovarian	TA095	CHTN0852	Tumor
Ovarian	TA102	4047	Tumor
Pancreatic	AB481	CHTN0150A	Tumor
Pancreatic	AB483	CHTN0155A	Tumor
Pancreatic	AB485	CHTN1065A	Tumor
Pancreatic	AB487	CHTN1548A	Tumor
Pancreatic	AB489	ACC0004A	Tumor
Pancreatic	AB491	ACC0009A	Tumor
Pancreatic	AB566	JH0001A	Tumor
Pancreatic	AB568	JH0005Aa	Tumor
Pancreatic	AB570	JH0006A	Tumor
Pancreatic	AB572	JH0010A	Tumor
Pancreatic	AB574	JH0016A	Tumor
Pancreatic	AB610	SU.86.86	Cell line
Pancreatic	AB680	JH0020	Xenograft
Pancreatic	AB682	JH0027	Xenograft
Pancreatic	AB696	JH0072	Xenograft
Pancreatic	AB698	JH0074	Xenograft
Pancreatic	AB700	JH0074	Xenograft
Pancreatic	AB714	JH0023	Xenograft
Pancreatic	AB718	JH0026	Xenograft
Pancreatic	AB720	JH0029	Xenograft
Pancreatic	AB722	JH0035	Xenograft
Pancreatic	AB728	JH0034	Xenograft
Pancreatic	AB765	JH0081	Xenograft
Pancreatic	AB767	JH0082	Xenograft
Pancreatic	AB769	JH0083	Xenograft
Pancreatic	AB779	JH0085	Xenograft
Pancreatic	AB783	JH0071	Tumor
Pancreatic	AB785	CHTN1780	Tumor
Pancreatic	AB880	JH0086	Xenograft
Pancreatic	AB882	JH0087	Xenograft
Pancreatic	AB884	JH0088	Xenograft
Pancreatic	AB886	JH0090	Xenograft
Pancreatic	AB888	JH0091	Xenograft
Pancreatic	AB890	JH0093	Xenograft
Pancreatic	CH147	CFPAC-1	Cell line
Pancreatic	CH149	COLO587	Cell line
Pancreatic	CH151	HPAF-II	Cell line
Pancreatic	CH153	Hs700T	Cell line
Pancreatic	CH155	PANC-1	Cell line
Pancreatic	CH157	BXPC-3	Cell line
Pancreatic	CH161	HGC-25	Cell line
Pancreatic	CH261	JH0032	Xenograft
Pancreatic	CH336	HPAC	Cell line
Pancreatic	CH352	ASPC-1	Cell line
Pancreatic	CH354	MIA-PaCa-2	Cell line
Pancreatic	CH356	MPanc-96	Cell line
Pancreatic	CH358	Panc03.27	Cell line
Pancreatic	CH360	CAPAN-1	Cell line
Pancreatic	CH362	CAPAN2	Cell line
Pancreatic	CH364	Panc10.05	Cell line
Pancreatic	CH404	SW1990	Cell line
Pancreatic	CH414	Panc08.13	Cell line
Pancreatic	CH416	JH0024	Xenograft
Pancreatic	KK012	A-13 B	Xenograft
Pancreatic	KK013	A-13 D	Xenograft
Pancreatic	KK025	2G10.4	Xenograft
Pancreatic	KK026	2G13A	Xenograft
Pancreatic	KK027	2G13B	Xenograft
Pancreatic	KK028	AGL	Xenograft
Pancreatic	KK030	A10.7	Xenograft
Pancreatic	TA009	JH0017	Xenograft
Pancreatic	TA011	JH0018	Xenograft
Pancreatic	TA012	Xeno 159	Xenograft
Pancreatic	TA017	JH0021	Xenograft
Pancreatic	TA019	JH0022	Xenograft
Pancreatic	TA021	JH0025	Xenograft
Pancreatic	TA025	JH0028	Xenograft
Pancreatic	TA027	JH0030	Xenograft
Pancreatic	TA029	JH0031	Xenograft
Pancreatic	TA033	JH0033	Xenograft
Pancreatic	TA035	JH0080	Xenograft
Pancreatic	TA144	E3GS2.4	Cell line
Prostate	AB660	KL00011	Tumor
Prostate	AB662	KL00012	Tumor
Prostate	AB664	KL00013	Tumor
Prostate	AB666	KL00014	Tumor
Prostate	AB668	KL00015	Tumor
Prostate	AB670	KL00016	Tumor
Prostate	AB672	KL00017	Tumor
Prostate	AB674	KL00018	Tumor
Prostate	KN0217	WA5-3	Tumor
Prostate	KN0218	WA12-2	Tumor
Prostate	KN0219	WA13-1	Tumor
Prostate	KN0220	WA21-6	Tumor
Prostate	KN0221	WA4-3	Tumor
Prostate	KN0222	WA16-10	Tumor
Prostate	KN0223	WA20-10	Tumor
Prostate	KN0224	WA5-1	Tumor
Prostate	KN0225	WA19-7	Tumor
Prostate	KN0226	WA16-12	Tumor
Prostate	KN0227	WA5-4	Tumor
Prostate	KN0228	WA18-11	Tumor
Prostate	KN0233	WA17-16	Tumor
Prostate	KN0234	WA4-1	Tumor
Prostate	KN0235	WA20-10	Tumor
Prostate	KN0730	MSK0043	Tumor
Prostate	KN0731	MSK0044	Tumor
Prostate	KN0732	MSK0045	Tumor
Prostate	KN0733	MSK0046	Tumor
Prostate	KO149	LNCAP	Cell line
Prostate	KO152	PC3	Cell line
Prostate	KO153	DU145	Cell line
