# Supplementary material for: Two Distinct Categories of Focal Deletions in Cancer Genomes
Source: PLoS One. 2013 Jun 21;8(6):e66264. doi: 10.1371/journal.pone.0066264 (PMC3689739; doi:10.1371/journal.pone.0066264)
Supplement: Table S5 — Differential frequency of deletions in CFS genes between breast cancer cell lines and primary breast tumors. This table show the numbers of breast cancer samples affected by focal deletions in the indicated genes, broken out by sample type (tumor or cell line). The average number of deletions affecting RefSeq genes is shown in the last row. (XLSX) [file pone.0066264.s006.xlsx]

## Sheet: Sheet1
Gene	Type	Number of Deletions
		Tumors	Cell Lines
LRP1B	CFS	2	7
WWOX	CFS	1	10
FHIT	CFS	0	8
KIAA1680	CFS	0	3
MACROD2	CFS	1	15
CDKN2A	TSG	4	2
NF1	TSG	4	7
TP53	TSG	5	4
BRCA1	TSG	10	10
AVERAGE		1	1.65
