# Supplementary material for: Two Distinct Categories of Focal Deletions in Cancer Genomes
Source: PLoS One. 2013 Jun 21;8(6):e66264. doi: 10.1371/journal.pone.0066264 (PMC3689739; doi:10.1371/journal.pone.0066264)
Supplement: Table S6 — The importance of individual predictors in the RF classifier. The mean decrease in the Gini index was used to calculate the relative important of the seven individual properties in the RF classifier. (XLSX) [file pone.0066264.s007.xlsx]

## Sheet: Sheet1
Property	Gini Index Decrease
Deletion Separation	2.9
Deletion Size	3.8
RNA/DNA Correlation	0.8
DNA copy number value	0.4
Cell Line Proportion	1.2
Deletion Isolation	3.2
